# Supplementary material
Source: publisher figshare collection journal article supplement (https://acs.figshare.com/ndownloader/files/26731294)
Supplement: Supplementary file 1 [file 26731294]

# Supporting Information

## Ag Nanocube Coupled with Heating Enhanced DSN-Assisted Cycling Amplification for Surface-Enhanced Raman Spectroscopy Detection of microRNA-21

Xing-Yuan Du, Shao-Hua Wu\*, Xiao-Bin Huang, Jian-Jun Sun

Ministry of Education Key Laboratory for Analytical Science of Food Safety and Biology, Fujian Provincial Key Laboratory of Analysis and Detection Technology for Food Safety, College of Chemistry, Fuzhou University, Fuzhou, Fujian 350108, China.

\*Corresponding Author. E-mail: [wsh@fzu.edu.cn](mailto:wsh@fzu.edu.cn)

### Figure S1

#### Temperature characterization and calibration for the heated electrode

The surface of the heated electrode is indirectly heated by the internal heating-element that is controlled by the temperature-controller, resulting in a difference between the actual temperature of the electrode surface ( $T_s$ ) and the setting temperature of temperature-controller ( $T_h$ ), so the  $T_s$  needs to be calibrated. We calibrate the relationship between  $T_h$  and  $T_s$  by the open circuit potential (OCP) method in 5 mM  $[\text{Fe}(\text{CN})_6]^{3-/4-}$  + 0.5 M KCl solution. Put the heated electrode into the solution, then connect the heated electrode to the electrochemical workstation and temperature-controller. Change the  $T_h$  in the temperature-controller at regular intervals, and record the corresponding potentials (Figure S1-A). Then the potentials can be converted to  $T_s$  by the temperature-potential coefficient which is  $-1.56 \text{ mV} \cdot \text{K}^{-1}$  for 5 mM  $[\text{Fe}(\text{CN})_6]^{3-/4-}$  + 0.5 M KCl solution. At last, we can obtain a linear

relationship between  $T_s$  and  $T_h$  (Figure S1-B). The linear regression equation was  $T_s = 0.944 T_h - 0.217$  ( $R^2 = 0.9999$ ). Later, once we set a  $T_h$ , a corresponding  $T_s$  can be obtained according to this linear equation. More details refer to ref<sup>39</sup>.

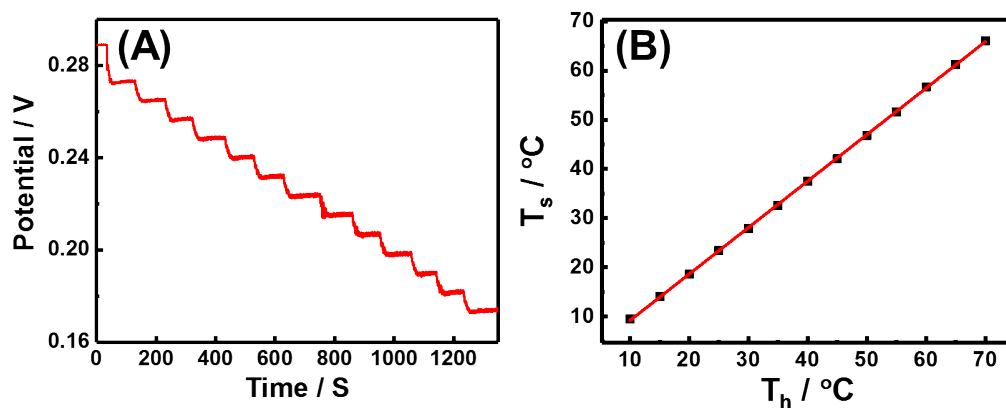

Figure S1. (A) The open circuit potential graph of heated electrode in 5 mM  $[\text{Fe}(\text{CN})_6]^{3-/4-} + 0.5 \text{ M}$  KCl solution. (B) The linear relationship between surface temperature of the heated electrode ( $T_s$ ) and the setting temperature of the temperature-controller ( $T_h$ ).

## Figure S2 Characterization of the stability of Au-S bonds

The dissociation of pDNA from the HAuE surface caused by the break of the Au-S bonds when the electrode is heated may cause false positive result. So we characterized the stability of Au-S bond by EIS at 55°C (the optimized electrode temperature). As can be seen in Figure S2,  $R_{ct}$  of pDNA/HAuE (Figure S2-a) was only slightly weakened after heated for 60 min at 55°C (Figure S2-b), suggesting the enough stability of Au-S bonds at 55°C in this work.

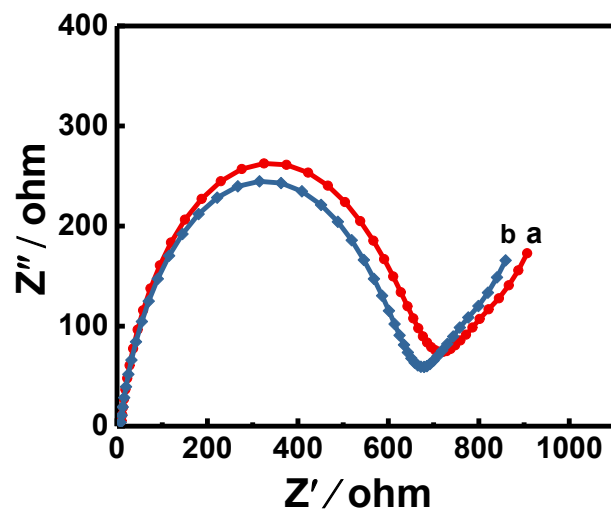

Figure S2. EIS curves of pDNA/HAuE before (a) and after (b) heated at 55°C for 60 min. The solution was 5 mM  $[\text{Fe}(\text{CN})_6]^{3-/4-}$  containing 0.5 M KCl.
